# Supplementary material for: Association between dipeptidyl peptidase-4 inhibitors and acute kidney injury in patients with diabetes mellitus: A disproportionality analysis based on the US Food and Drug Administration Adverse Event Reporting System
Source: Research Square preprint supplement (doi:10.21203/rs.3.rs-6728366/v1), 2025-06-10
Supplement: Supplementary file 1 [file d6baf9d65d5a77f897648484.docx]

**TABLE S1**. Association of AKI and ten classes of AKI inducers defined in this study.

| Drug class |  | Number of cases | Number of Total | ROR  (95 % CI) |
| --- | --- | --- | --- | --- |
| ACE inhibitor | | 2,311 | 33,987 | 2.63 (2.50–2.77) |
| ARB | | 1,702 | 26,512 | 2.29 (2.16–2.42) |
| SGLT-2 inhibitor | | 1,569 | 23,242 | 2.40 (2.26–2.54) |
| Loop diuretic | | 1,944 | 20,345 | 3.82 (3.61–4.03) |
| Thiazide diuretic | | 1,234 | 14,644 | 3.00 (2.82–3.20) |
| NSAIDs | | 823 | 8,744 | 3.27 (3.02–3.52) |
| Anti-HSV drug | | 156 | 1,922 | 2.59 (2.19–3.05) |
| CNI | | 124 | 1,424 | 2.79 (2.32–3.36) |
| vancomycin | | 74 | 559 | 4.45 (3.48–5.69) |
| cisplatin | | 22 | 270 | 2.57 (1.66–3.98) |

ACE, angiotensin converting enzyme; ARB, angiotensin receptor blocker; SGLT2, sodium glucose cotransporter 2; NSAID, non-steroidal anti-inflammatory drug; Anti-HSV, anti-herpes simplex virus; CNI, calcineurin inhibitor; FAERS, FDA Adverse Event Reporting System; ROR, reporting odds ratio; CI, confidence interval
